CORRECTION

# Correction: A Supplementary System for a Brain-Machine Interface Based on Jaw Artifacts for the Bidimensional Control of a Robotic Arm

The *PLOS ONE* Staff

There are errors in the Funding section. The correct funding information is as follows: This research has been funded by the Spanish Ministry of Economy and Competitiveness as part of the Brain2motion project—Development of a Multimodal Brain-Neural Interface to Control an Exoskeletal: Neuroprosthesis Hybrid Robotic System for the Upper Limb (DPI2011-27022-C02-01). The funders had no role in study design, data collection and analysis, decision to publish, or preparation of the manuscript.

## Reference

1. Costa Á, Hortal E, Iáñez E, Azorín JM (2014) A Supplementary System for a Brain-Machine Interface Based on Jaw Artifacts for the Bidimensional Control of a Robotic Arm. *PLoS ONE* 9(11): e112352. doi: [10.1371/journal.pone.0112352](https://doi.org/10.1371/journal.pone.0112352) PMID: [25390372](https://pubmed.ncbi.nlm.nih.gov/25390372/)

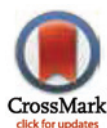

## OPEN ACCESS

**Citation:** The *PLOS ONE* Staff (2015) Correction: A Supplementary System for a Brain-Machine Interface Based on Jaw Artifacts for the Bidimensional Control of a Robotic Arm. *PLoS ONE* 10(2): e0118257. doi:10.1371/journal.pone.0118257

**Published:** February 6, 2015

**Copyright:** © 2015 The PLOS ONE Staff. This is an open access article distributed under the terms of the [Creative Commons Attribution License](https://creativecommons.org/licenses/by/4.0/), which permits unrestricted use, distribution, and reproduction in any medium, provided the original author and source are credited.
